# Supplementary material for: The Effect of Natural-Based Formulation (NBF) on the Response of RAW264.7 Macrophages to LPS as an In Vitro Model of Inflammation
Source: MDPI journal article supplement (doi:10.3390/jof8030321), 2022-03-21
Supplement: s1 [file s1]

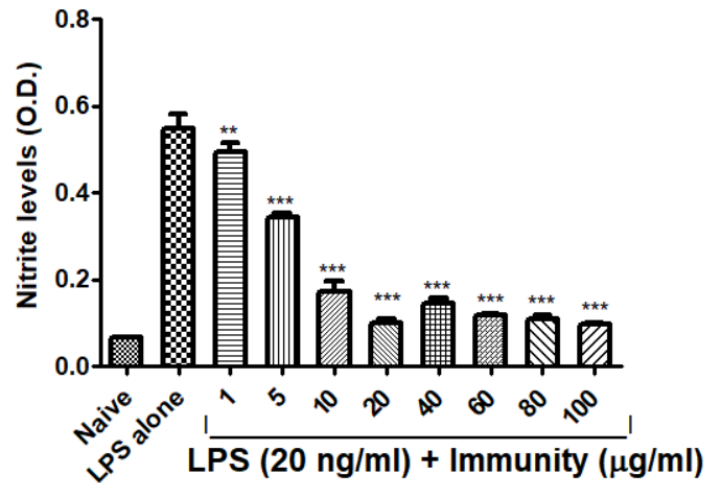

Supplementary Figure S1. Dose-response of nitrite accumulation (NO release) following exposure of RAW 264.7 macrophages to LPS (20 ng/ml) in the absence or presence of various concentrations of Immunity ( $\mu\text{g/ml}$ ). One way ANOVA was performed with Bonferroni's post-hoc correction ( $n=4$  for each group). \*\*  $p<0.01$  and \*\*\*  $p<0.001$  compared to LPS alone.

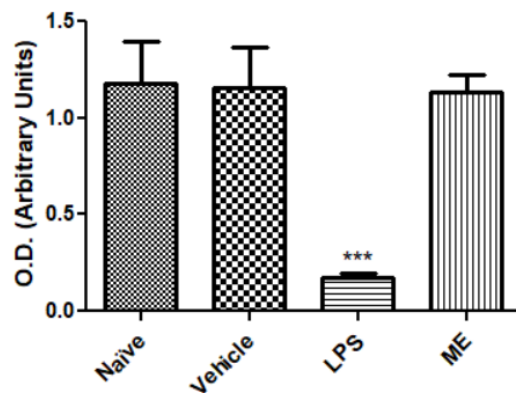

Supplementary Figure S2. XTT assay of RAW264.7 cells following 72 hours treatment with mushroom extract. The RAW264.7 cells were exposed to 20 ng/ml LPS along with or without corresponding vehicle and mushroom extracts. The 20  $\mu\text{g/ml}$  of mushroom extract did not show any toxic effects until 72 hours of the treatment. One way ANOVA was performed with Bonferroni's post-hoc correction ( $n=8$  for each group). \*\*\*  $p<0.001$  compared to naïve/vehicle.
