# Supplementary material for: The Effect of Natural-Based Formulation (NBF) on the Response of RAW264.7 Macrophages to LPS as an In Vitro Model of Inflammation
Source: MDPI journal article supplement (doi:10.3390/jof8030321), 2022-03-21
Supplement: s1 [file s1]

**Supplementary data for Figure 6:**

Primers:

TLR2-Mus-F: 5' – AAGAGGAAGCCCAAGAAAGC - 3'

TLR2-Mus-R: 5' – CAATGGGAATCCTGCTCACT - 3'

Product size: 80bp

TLR4-Mus-F: 5' – GGCAGCAGGTGGAATTGTAT- 3'

TLR4-Mus-R: 5' – AGGATTCGAGGCTTTTCCAT- 3'

Product size: 131bp

NF-κB -F: 5' – CACCTAGCTGCCAAAGAAGG- 3

NF-κB -R: 5' – GCAGGCTATTGCTCATCACA - 3

Product size: 136 bp

GAPDH-Mus-F: 5' – CCTGCACCACCAACTGCTTA- 3

GAPDH-Mus-R: 5' – CCATCCACAGTCTTCTGAG - 3'

Product size: 131 bp
